# Supplementary material
Source: MDPI journal article supplement (https://www.mdpi.com/1999-4907/12/6/788)
Supplement: s1 [file s1]

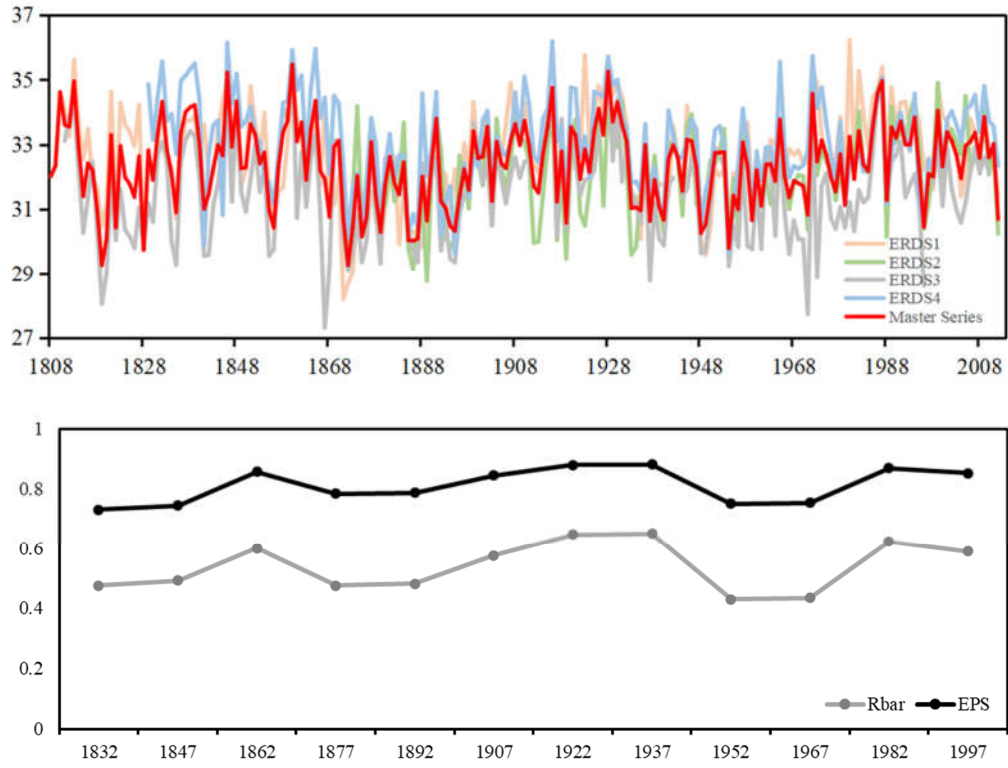

**Figure S1.** (a) Four measured individual series and the master series of  $\delta^{18}\text{O}$  produced by the numerical mixing method.(b) Mean interseries correlation (Rbar), the running expressed population signal calculated using 30-year windows and a lag time of 15 years.

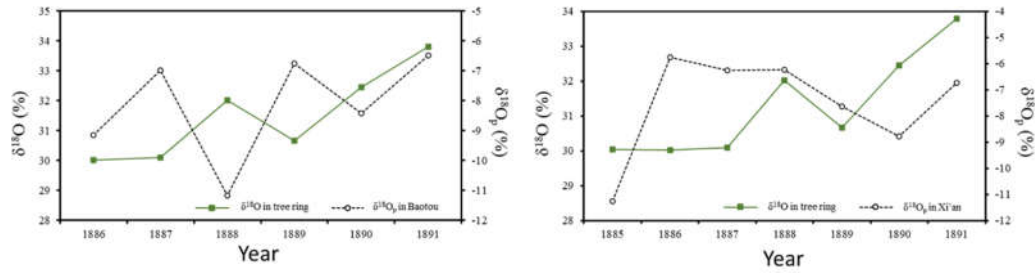

**Figure S2.** Comparison between tree ring  $\delta^{18}\text{O}$  and Global Network of Isotopes in Precipitation (GNIP)  $\delta^{18}\text{O}_P$  from June to August in Baotou and Xi'an.

**Table S1.** Statistical Features of Four Individual Series and the Master Series

| Series | Length(years) | Mean(‰) | Maximum(‰) | Minimum(‰) | Standard deviation(‰) | Skewness | Kurtosis |
|--------|---------------|---------|------------|------------|-----------------------|----------|----------|
| ERDS1  | 203           | 32.67   | 36.23      | 28.20      | 1.48                  | -0.23    | 0.02     |
| ERDS2  | 139           | 32.15   | 35.03      | 28.77      | 1.39                  | -0.22    | -0.63    |
| ERDS3  | 197           | 31.54   | 35.43      | 27.31      | 1.51                  | -0.07    | -0.25    |
| ERDS4  | 184           | 33.08   | 36.18      | 29.63      | 1.42                  | -0.16    | -0.40    |
| Master | 205           | 32.38   | 35.47      | 29.28      | 1.24                  | -0.11    | -0.32    |

**Table S2.** Correlation Coefficients Between Each of the Four Individual  $\delta^{18}\text{O}$  Series

| <b>Series</b> | <b>ERDS2</b> | <b>ERDS3</b> | <b>ERDS4</b> |
|---------------|--------------|--------------|--------------|
| ERDS1         | 0.564        | 0.527        | 0.547        |
| ERDS2         |              | 0.619        | 0.663        |
| ERDS3         |              |              | 0.707        |

Note. All  $p < 0.001$ .
